# Supplementary material for: MyProteinNet: build up-to-date protein interaction networks for organisms, tissues and user-defined contexts
Source: PubMed Central journal article supplement (PMC4489290; doi:10.1093/nar/gkv515), 2015-05-18
Supplement: supp_gkv515_nar-00634-web-b-2015-File003.pdf [file supp_gkv515_nar-00634-web-b-2015-File003.pdf]

# Supplementary Information

---

## **MyProteinNet: Build up-to-date protein interaction networks for organisms, tissues and user-defined contexts**

Omer Basha<sup>1</sup>, Dvir Flom<sup>2</sup>, Ruth Barshir<sup>1</sup>, Ilan Smoly<sup>2</sup>, Shoval Tirman<sup>1</sup> & Esti Yeger-Lotem<sup>1,3,\*</sup>

<sup>1</sup>Department of Clinical Biochemistry & Pharmacology, Faculty of Health Sciences;

<sup>2</sup>Department of Computer Science, Faculty of Natural Sciences; and <sup>3</sup>National Institute for Biotechnology in the Negev, Ben-Gurion University of the Negev, Beer-Sheva 84105, Israel

\* Corresponding author: [estiyl@bgu.ac.il](mailto:estiyl@bgu.ac.il)

MyProteinNet: <http://netbio.bgu.ac.il/myproteinnnet>

### **This file contains the following Tables:**

**Supplementary Table 1.** Detection methods considered by MyProteinNet as experimental validation for physical interaction.

**Supplementary Table 2.** The grouping of detection methods by type (for MyProteinNet's PPI scoring scheme).

**Supplementary Table 1: Detection methods considered by MyProteinNet as experimental validation for physical interaction.**

| PSI-MITAB Identifier | Method Name                                       |
|----------------------|---------------------------------------------------|
| MI:0004              | affinity chromatography technology                |
| MI:0006              | anti bait coimmunoprecipitation                   |
| MI:0007              | anti tag coimmunoprecipitation                    |
| MI:0009              | bacterial display                                 |
| MI:0010              | beta galactosidase complementation                |
| MI:0011              | beta lactamase complementation                    |
| MI:0012              | bioluminescence resonance energy transfer         |
| MI:0013              | biophysical                                       |
| MI:0014              | adenylate cyclase complementation                 |
| MI:0016              | circular dichroism                                |
| MI:0017              | classical fluorescence spectroscopy               |
| MI:0018              | two hybrid                                        |
| MI:0019              | coimmunoprecipitation                             |
| MI:0020              | transmission electron microscopy                  |
| MI:0030              | cross-linking study                               |
| MI:0031              | protein cross-linking with a bifunctional reagent |
| MI:0038              | dynamic light scattering                          |
| MI:0040              | electron microscopy                               |
| MI:0041              | electron nuclear double resonance                 |
| MI:0042              | electron paramagnetic resonance                   |
| MI:0043              | electron resonance                                |
| MI:0047              | far western blotting                              |
| MI:0049              | filter binding                                    |
| MI:0051              | fluorescence technology                           |
| MI:0052              | fluorescence correlation spectroscopy             |
| MI:0053              | fluorescence polarization spectroscopy            |
| MI:0054              | fluorescence-activated cell sorting               |
| MI:0055              | fluorescent resonance energy transfer             |
| MI:0065              | isothermal titration calorimetry                  |
| MI:0067              | light scattering                                  |
| MI:0069              | mass spectrometry studies of complexes            |
| MI:0071              | molecular sieving                                 |
| MI:0077              | nuclear magnetic resonance                        |
| MI:0090              | protein complementation assay                     |
| MI:0091              | chromatography technology                         |
| MI:0096              | pull down                                         |
| MI:0097              | reverse ras recruitment system                    |

|         |                                                    |
|---------|----------------------------------------------------|
| MI:0099 | scintillation proximity assay                      |
| MI:0104 | static light scattering                            |
| MI:0107 | surface plasmon resonance                          |
| MI:0111 | dihydrofolate reductase reconstruction             |
| MI:0112 | ubiquitin reconstruction                           |
| MI:0114 | x-ray crystallography                              |
| MI:0115 | yeast display                                      |
| MI:0225 | chromatin immunoprecipitation array                |
| MI:0226 | ion exchange chromatography                        |
| MI:0227 | reverse phase chromatography                       |
| MI:0231 | mammalian protein protein interaction trap         |
| MI:0232 | transcriptional complementation assay              |
| MI:0276 | blue native page                                   |
| MI:0369 | lex-a dimerization assay                           |
| MI:0370 | tox-r dimerization assay                           |
| MI:0397 | two hybrid array                                   |
| MI:0398 | two hybrid pooling approach                        |
| MI:0399 | two hybrid fragment pooling approach               |
| MI:0402 | chromatin immunoprecipitation assay                |
| MI:0404 | comigration in non denaturing gel electrophoresis  |
| MI:0410 | electron tomography                                |
| MI:0411 | enzyme linked immunosorbent assay                  |
| MI:0412 | electrophoretic mobility supershift assay          |
| MI:0413 | electrophoretic mobility shift assay               |
| MI:0416 | fluorescence microscopy                            |
| MI:0417 | footprinting                                       |
| MI:0419 | gtpase assay                                       |
| MI:0420 | kinase homogeneous time resolved fluorescence      |
| MI:0423 | in-gel kinase assay                                |
| MI:0424 | protein kinase assay                               |
| MI:0425 | kinase scintillation proximity assay               |
| MI:0426 | light microscopy                                   |
| MI:0428 | imaging technique                                  |
| MI:0430 | nucleic acid uv cross-linking assay                |
| MI:0432 | one hybrid                                         |
| MI:0434 | phosphatase assay                                  |
| MI:0437 | protein three hybrid                               |
| MI:0509 | phosphatase homogeneous time resolved fluorescence |
| MI:0510 | homogeneous time resolved fluorescence             |
| MI:0511 | protease homogeneous time resolved fluorescence    |
| MI:0514 | in gel phosphatase assay                           |

|         |                                                   |
|---------|---------------------------------------------------|
| MI:0515 | methyltransferase assay                           |
| MI:0516 | methyltransferase radiometric assay               |
| MI:0588 | three hybrid                                      |
| MI:0602 | chemical footprinting                             |
| MI:0603 | dimethylsulphate footprinting                     |
| MI:0604 | potassium permanganate footprinting               |
| MI:0605 | enzymatic footprinting                            |
| MI:0606 | DNase I footprinting                              |
| MI:0655 | lambda repressor two hybrid                       |
| MI:0663 | confocal microscopy                               |
| MI:0676 | tandem affinity purification                      |
| MI:0726 | reverse two hybrid                                |
| MI:0727 | lexa b52 complementation                          |
| MI:0728 | gal4 vp16 complementation                         |
| MI:0729 | luminescence based mammalian interactome mapping  |
| MI:0807 | comigration in gel electrophoresis                |
| MI:0808 | comigration in sds page                           |
| MI:0809 | bimolecular fluorescence complementation          |
| MI:0809 | bimolecular fluorescence complementation          |
| MI:0814 | protease accessibility laddering                  |
| MI:0824 | x-ray powder diffraction                          |
| MI:0825 | x-ray fiber diffraction                           |
| MI:0826 | x ray scattering                                  |
| MI:0827 | x-ray tomography                                  |
| MI:0841 | phosphotransferase assay                          |
| MI:0858 | immunodepleted coimmunoprecipitation              |
| MI:0859 | intermolecular force                              |
| MI:0872 | atomic force microscopy                           |
| MI:0879 | nucleoside triphosphatase assay                   |
| MI:0880 | atpase assay                                      |
| MI:0888 | small angle neutron scattering                    |
| MI:0891 | neutron fiber diffraction                         |
| MI:0892 | solid phase assay                                 |
| MI:0893 | neutron diffraction                               |
| MI:0894 | electron diffraction                              |
| MI:0895 | protein kinase A complementation                  |
| MI:0901 | isotope label footprinting                        |
| MI:0905 | amplified luminescent proximity homogeneous assay |
| MI:0916 | lexa vp16 complementation                         |
| MI:0921 | surface plasmon resonance array                   |
| MI:0928 | filter trap assay                                 |

|         |                                                        |
|---------|--------------------------------------------------------|
| MI:0938 | rheology measurement                                   |
| MI:0943 | detection by mass spectrometry                         |
| MI:0944 | mass spectrometry study of hydrogen/deuterium exchange |
| MI:0947 | bead aggregation assay                                 |
| MI:0963 | interactome parallel affinity capture                  |
| MI:0964 | infrared spectroscopy                                  |
| MI:0965 | 2d-infrared spectrometry                               |
| MI:0966 | ultraviolet-visible spectroscopy                       |
| MI:0968 | biosensor                                              |
| MI:0969 | bio-layer interferometry                               |
| MI:0976 | total internal reflection fluorescence spectroscopy    |
| MI:0979 | oxidoreductase assay                                   |
| MI:0982 | electrophoretic mobility-based method                  |
| MI:0983 | gemma                                                  |
| MI:0984 | deaminase assay                                        |
| MI:0989 | amidase assay                                          |
| MI:1000 | hydroxylase assay                                      |
| MI:1001 | lipidase assay                                         |
| MI:1002 | myristoylase assay                                     |
| MI:1003 | geranylgeranylase assay                                |
| MI:1004 | palmitoylase assay                                     |
| MI:1005 | adp ribosylase assay                                   |
| MI:1006 | deglycosylase assay                                    |
| MI:1008 | sumoylase assay                                        |
| MI:1009 | desumoylase assay                                      |
| MI:1016 | fluorescence recovery after photobleaching             |
| MI:1017 | rna immunoprecipitation                                |
| MI:1019 | protein phosphatase assay                              |
| MI:1024 | scanning electron microscopy                           |
| MI:1026 | diphtamidase assay                                     |
| MI:1028 | modified chromatin immunoprecipitation                 |
| MI:1029 | proteomics of isolated chromatin segments              |
| MI:1030 | excimer fluorescence                                   |
| MI:1037 | Split renilla luciferase complementation               |
| MI:1038 | silicon nanowire field-effect transistor               |
| MI:1086 | equilibrium dialysis                                   |
| MI:1103 | solution state nmr                                     |
| MI:1104 | solid state nmr                                        |
| MI:1111 | two hybrid bait or prey pooling approach               |
| MI:1112 | two hybrid prey pooling approach                       |
| MI:1113 | two hybrid bait and prey pooling approach              |

|         |                                               |
|---------|-----------------------------------------------|
| MI:1137 | carboxylation assay                           |
| MI:1138 | decarboxylation assay                         |
| MI:1142 | aminoacylation assay                          |
| MI:1145 | phospholipase assay                           |
| MI:1147 | amplification assay                           |
| MI:1183 | nuclease footprinting                         |
| MI:1189 | methylation interference assay                |
| MI:1190 | hydroxy radical footprinting                  |
| MI:1191 | ultraviolet (uv) footprinting                 |
| MI:1203 | split luciferase complementation              |
| MI:1204 | split firefly luciferase complementation      |
| MI:1218 | chromosome conformation capture assay         |
| MI:1219 | enzyme-mediated activation of radical sources |
| MI:1229 | uridylation assay                             |
| MI:1235 | thermal shift binding                         |
| MI:1236 | proline isomerase assay                       |
| MI:1238 | mass spectrometry studies of subunit exchange |
| MI:1246 | ion mobility mass spectrometry of complexes   |
| MI:1249 | isomerase assay                               |
| MI:1252 | methylmalonyl-CoA isomerase assay             |

**Supplementary Table 2. The grouping of detection methods by type (for MyProteinNet's PPI scoring scheme).**

| Assay type             | PSI-MITAB Identifiers                                                                                                                                                                                                                                   |
|------------------------|---------------------------------------------------------------------------------------------------------------------------------------------------------------------------------------------------------------------------------------------------------|
| 2-hybrid               | MI:0018,MI:0397,MI:0727,MI:0728,MI:0398,MI:1113,MI:1111,MI:1112,MI:0399                                                                                                                                                                                 |
| ADP-ribosylase         | MI:1005                                                                                                                                                                                                                                                 |
| Amidase                | MI:0989                                                                                                                                                                                                                                                 |
| Aminoacylation         | MI:1142                                                                                                                                                                                                                                                 |
| Ampylation             | MI:1147                                                                                                                                                                                                                                                 |
| Biophysical            | MI:0013,MI:0859,MI:0938,MI:0065,MI:0067,MI:0104,MI:0038,MI:0826,MI:0891,MI:0893,MI:0016,MI:1235,MI:1311,MI:1219,MI:0894,MI:0905,MI:0964,MI:0965,MI:0966,MI:0968,MI:0107,MI:0921,MI:1038,MI:0969,MI:0043,MI:0042,MI:0041,MI:1247,MI:0099,MI:0888,MI:1086 |
| Carboxylation          | MI:1137                                                                                                                                                                                                                                                 |
| Chromatography         | MI:0091,MI:0227,MI:0004,MI:0096,MI:0963,MI:0676,MI:0928,MI:0226,MI:0071                                                                                                                                                                                 |
| Co-immunoprecipitation | MI:0019,MI:0402,MI:1218,MI:1028,MI:0225,MI:1029,MI:0858,MI:0946,MI:0007,MI:0006,MI:1017                                                                                                                                                                 |
| Complementation        | MI:0090,MI:0895,MI:0097,MI:0370,MI:0014,MI:0111,MI:0112,MI:0010,MI:0011,MI:0809,MI:0232,MI:0588,MI:0369,MI:0726,MI:0655,MI:0432,MI:0437,MI:0916,MI:1203,MI:1204,MI:1037                                                                                 |
| Crosslink              | MI:0030,MI:0430,MI:0031                                                                                                                                                                                                                                 |
| de-ADP                 | MI:1309                                                                                                                                                                                                                                                 |
| Deaminase              | MI:0984                                                                                                                                                                                                                                                 |
| Decarboxylation        | MI:1138                                                                                                                                                                                                                                                 |
| Deglycosylase          | MI:1006                                                                                                                                                                                                                                                 |
| Desumoylase            | MI:1009                                                                                                                                                                                                                                                 |
| Diphtamidase           | MI:1026                                                                                                                                                                                                                                                 |
| Electrophoresis        | MI:0982,MI:0807,MI:0404,MI:0276,MI:0413,MI:0412,MI:1312,MI:0808,MI:0983                                                                                                                                                                                 |
| Fluorescence           | MI:0051,MI:0012,MI:1030,MI:0055,MI:0017,MI:0809,MI:1016,MI:0052,MI:0053,MI:0054,MI:0115,MI:0009,MI:0510,MI:0509,MI:0511,MI:0420,MI:0976                                                                                                                 |
| Footprinting           | MI:0417,MI:1191,MI:0605,MI:0814,MI:1189,MI:1183,MI:0606,MI:0901,MI:0602,MI:1190,MI:0603,MI:0604                                                                                                                                                         |
| Hydroxylase            | MI:1000                                                                                                                                                                                                                                                 |
| Isomerase              | MI:1249,MI:1236,MI:1252                                                                                                                                                                                                                                 |
| Lipidase               | MI:1001,MI:1004,MI:1002,MI:1003                                                                                                                                                                                                                         |
| Lumier                 | MI:0729                                                                                                                                                                                                                                                 |
| Mappit                 | MI:0231                                                                                                                                                                                                                                                 |
| Methyltransferase      | MI:0515,MI:0516                                                                                                                                                                                                                                         |
| Microscopy             | MI:0428,MI:0426,MI:0872,MI:0663,MI:0416,MI:0040,MI:0410,MI:0020,MI:1024                                                                                                                                                                                 |
| MS-interact            | MI:0943,MI:0069,MI:1246,MI:1238,MI:0944                                                                                                                                                                                                                 |
| NMR                    | MI:0077,MI:1104,MI:1103                                                                                                                                                                                                                                 |

|                    |                                                 |
|--------------------|-------------------------------------------------|
| Oxidoreductase     | MI:0979                                         |
| Phosphatase        | MI:0434,MI:0514,MI:0879,MI:0419,MI:0880,MI:1019 |
| Phospholipase      | MI:1145                                         |
| Phosphotransferase | MI:0841,MI:0424,MI:0425,MI:0423                 |
| solid-phase        | MI:0892,MI:0411,MI:0049,MI:0047,MI:0947         |
| Sumoylase          | MI:1008                                         |
| Uridylation        | MI:1229                                         |
| X-ray              | MI:0114,MI:0825,MI:0824,MI:0827                 |
